# Supplementary material
Source: publisher figshare collection journal article supplement (https://acs.figshare.com/ndownloader/files/27413568)
Supplement: Supplementary file 1 [file 27413568]

## Supporting Information

# **An Efficient Strategy to Prepare Ultra-High Sensitivity SERS-Active Substrate Based on Laser-Induced Selective Metallization of Polymers**

*Rui Xu,<sup>†, a</sup> Ruilong Li,<sup>†, b</sup> Liyang Jia,<sup>a</sup> Zhuo Zheng,<sup>a</sup> and Tao Zhou<sup>a, \*</sup>*

<sup>a</sup> State Key Laboratory of Polymer Materials Engineering of China, Polymer Research Institute, Sichuan University, Chengdu 610065, China; <sup>b</sup> Coal Chemical Industry Technology Research Institute, Ningxia Coal Industry Co. Ltd, China Energy Group, Yinchuan 750411, China

\*Corresponding author. Tel.: +86-28-85402601; Fax: +86-28-85402465; E-mail address: zhoutaopoly@scu.edu.cn (T. Zhou)

Total number of pages: 9

Total number of figures: 8

Total number of tables: 1

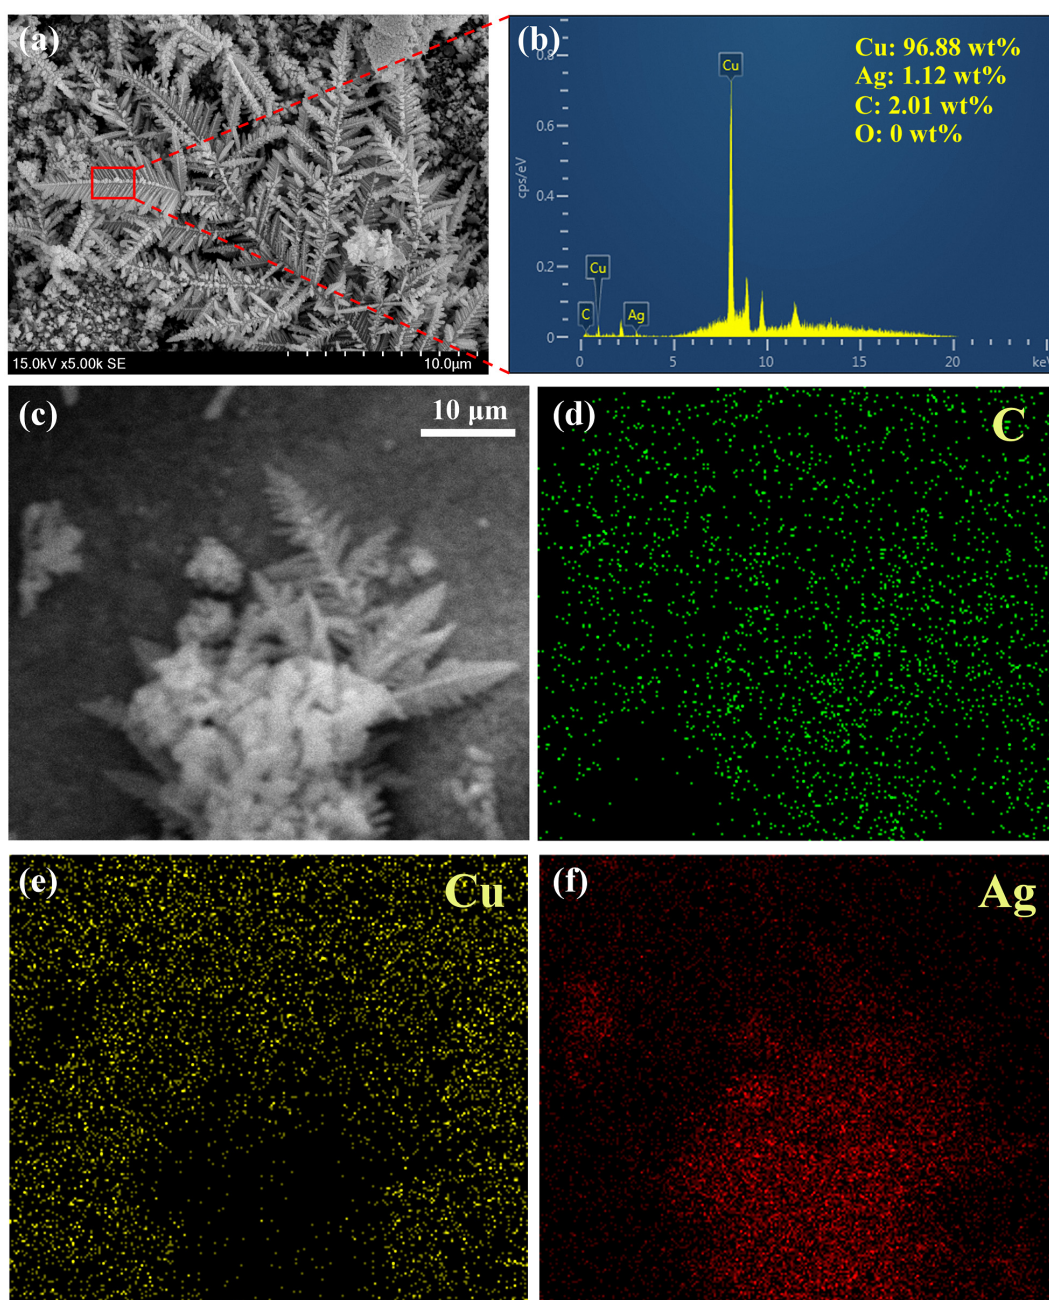

**Figure S1.** (a) Typical morphology and structure of “fern branches and leaves” on the SERS-3 substrate. (b) The corresponding EDS spectrum at the given region in **Figure S1(a)**. (c) SEM image of “fern branches and leaves” for EDS mapping. (d), (e), (f) EDS mapping of **Figure S1(c)** for C, Cu, and Ag elements, respectively.

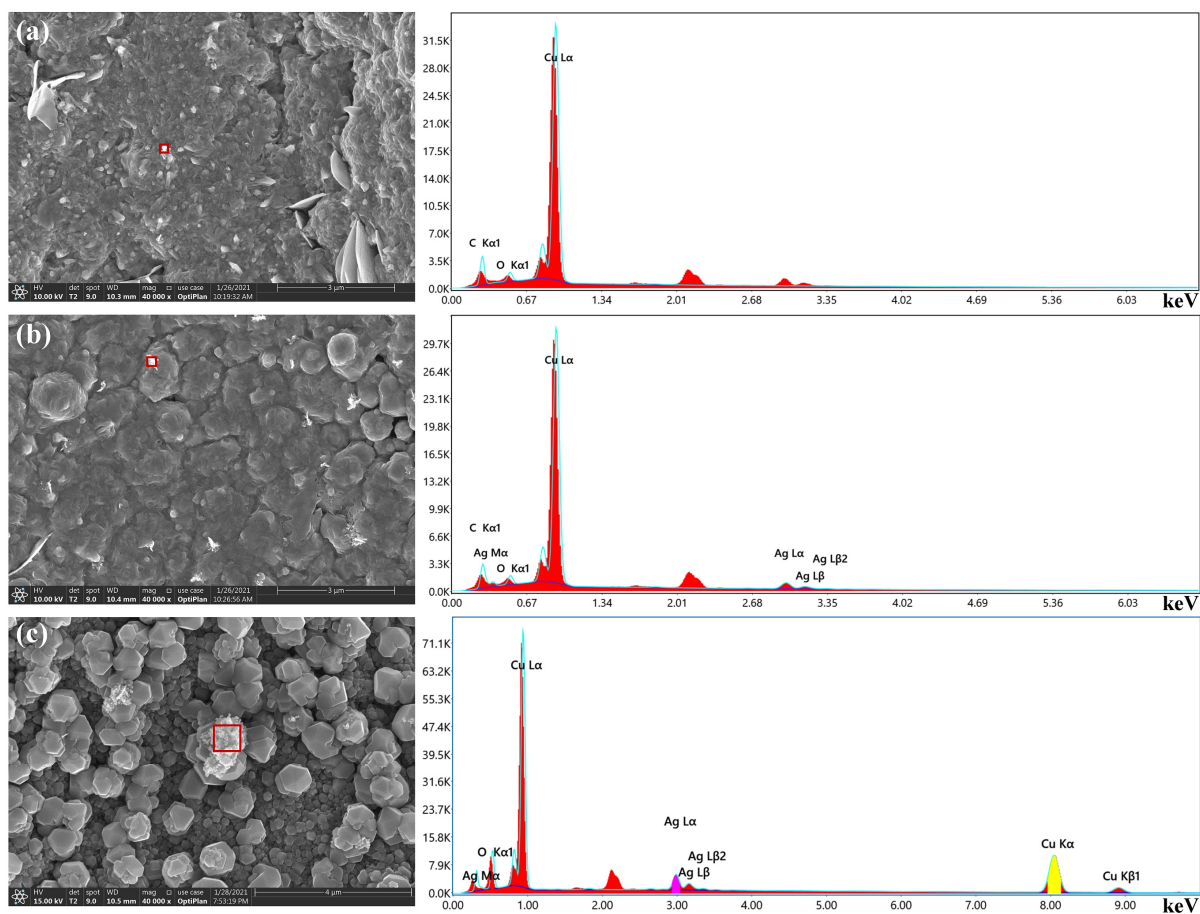

**Figure S2.** Surface SEM images (left) and the corresponding EDS spectra (right) at the given regions of SERS-0.1, SERS-0.2, SERS-0.5 substrates. **(a)** SERS-0.1; **(b)** SERS-0.2, **(c)** SERS-0.5.

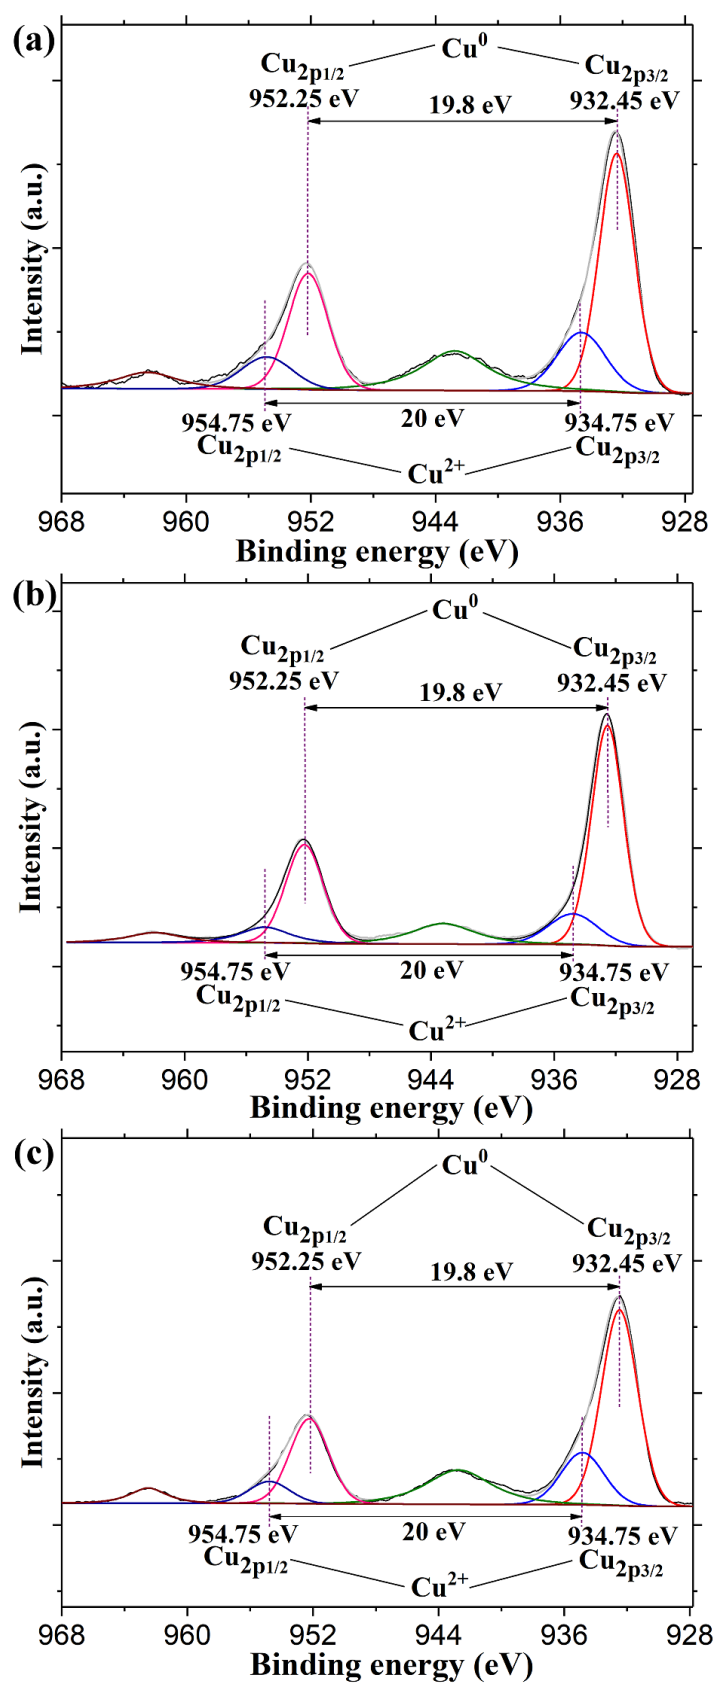

**Figure S3.** XPS high-resolution spectra of Cu 2p for the prepared SERS-active substrates. (a) SERS-1; (b) SERS-2; (c) SERS-3.

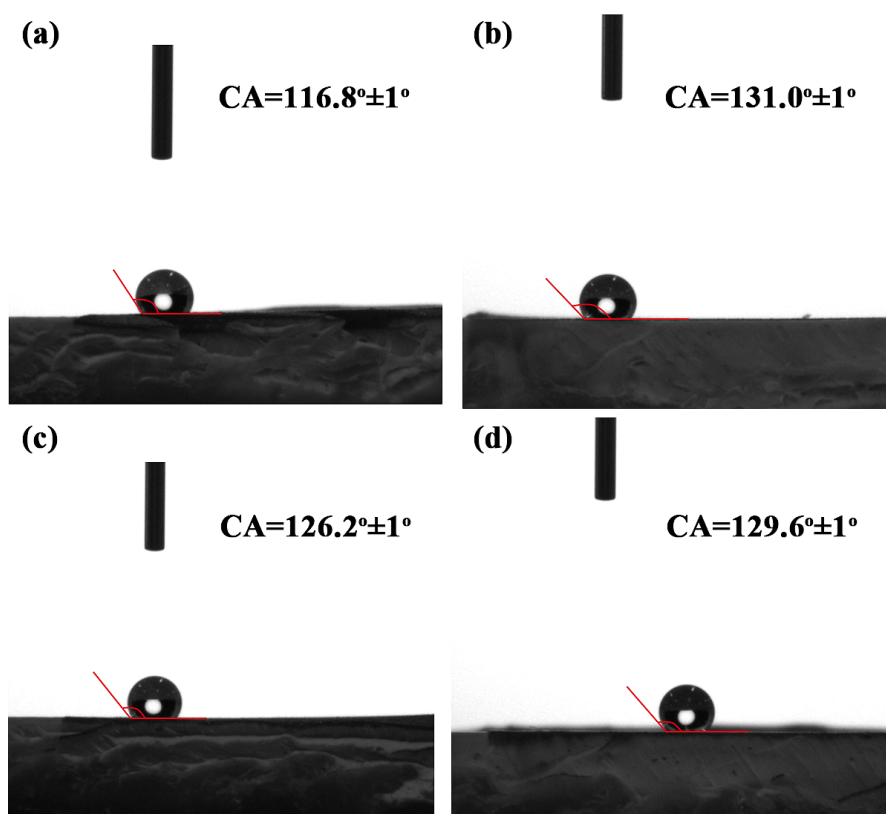

**Figure S4.** Surface contact angles of the prepared SERS-active substrates. (a) SERS-0; (b) SERS-1; (c) SERS-2; (d) SERS-3.

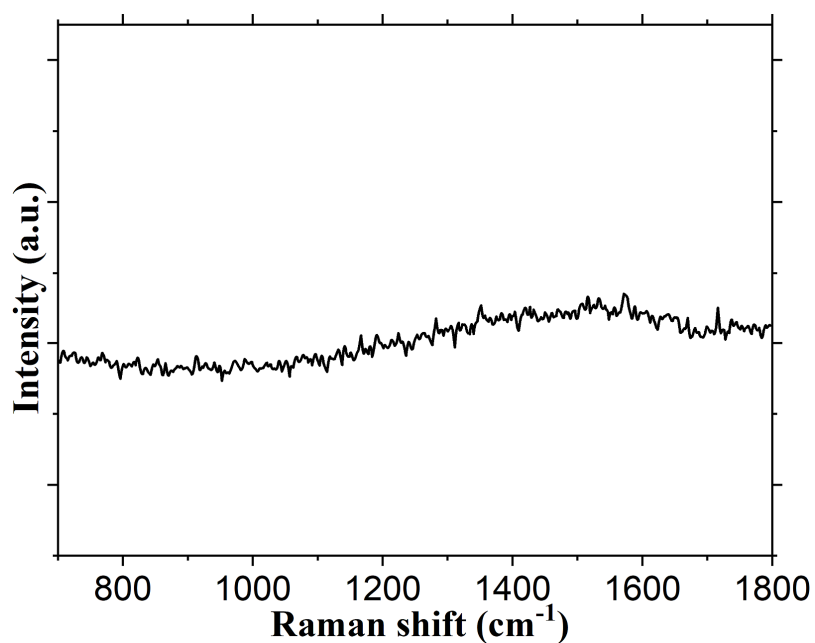

**Figure S5.** SERS spectrum of R6G molecule using the SERS substrate before galvanic replacement with silver ions.

## The Calculations of the Analytical Enhancement Factor (AEF)

Herein, the most commonly used analytical enhancement factors (AEF) have been calculated, and it used to compare the average SERS enhancements of different substrates.

The following equation is the definition of AEF:

$$AEF = \frac{I_{SERS}/C_{SERS}}{I_{RS}/C_{RS}} \quad (1)$$

where  $I_{SERS}$  and  $I_{RS}$  are the spectral intensities of the SERS spectrum and ordinary Raman spectrum, respectively. The  $C_{RS}$  is a given concentration of the analyte, and the  $C_{SERS}$  is the different concentration of the same analyte on the SERS substrate.

In our work, the SERS spectra and ordinary Raman spectrum were recorded for the calculations of AEF. The SERS spectra were collected from SERS-1 substrates treated with  $1 \times 10^{-5}$  M,  $1 \times 10^{-11}$  M, and  $1 \times 10^{-17}$  M R6G solutions, respectively. The ordinary Raman spectrum was collected from a glass slide treated with a  $1 \times 10^{-3}$  M R6G solution. The reason why we chose a  $1 \times 10^{-3}$  M R6G solution is that the minimum detection lower limit is only  $1 \times 10^{-3}$  M when using a glass slide.

For the SERS spectra and ordinary Raman spectrum, the spectral intensity of peak at  $613 \text{ cm}^{-1}$  was chosen for calculations. For  $1 \times 10^{-5}$  M,  $1 \times 10^{-11}$  M, and  $1 \times 10^{-17}$  M R6G solutions, the intensities of SERS spectra at  $613 \text{ cm}^{-1}$  are  $I_{SERS}=20672$ ,  $I_{SERS}=5220$ ,  $I_{SERS}=761$ , respectively. And, the intensity of the ordinary Raman spectrum at  $613 \text{ cm}^{-1}$  is  $I_{RS}=1051$ .

Thus, for  $1 \times 10^{-5}$  M R6G solution, the AEF of the SERS-1 substrate is as follows:

$$AEF = \frac{20672/10^{-5}}{1051/10^{-3}} = 1.97 \times 10^3$$

For  $1 \times 10^{-11}$  M R6G solution, the AEF of the SERS-1 substrate is:

$$AEF = \frac{5220/10^{-11}}{1051/10^{-3}} = 4.97 \times 10^8$$

For  $1 \times 10^{-17}$  M R6G solution, the AEF of the SERS-1 substrate is:

$$AEF = \frac{761/10^{-17}}{1051/10^{-3}} = 7.24 \times 10^{13}$$

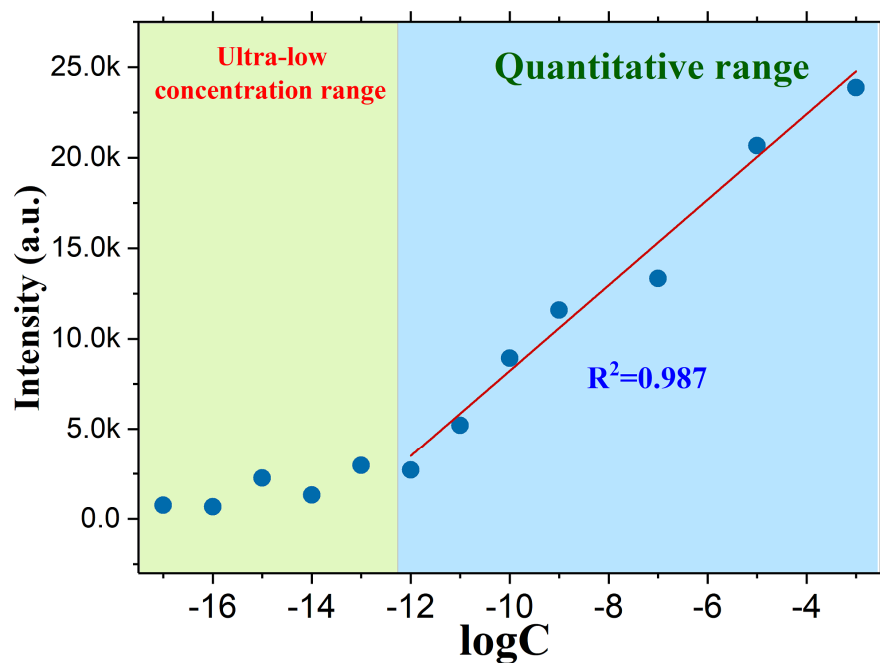

**Figure S6.** Relationship between spectral intensities of  $613\text{ cm}^{-1}$  and the concentrations of R6G solutions.

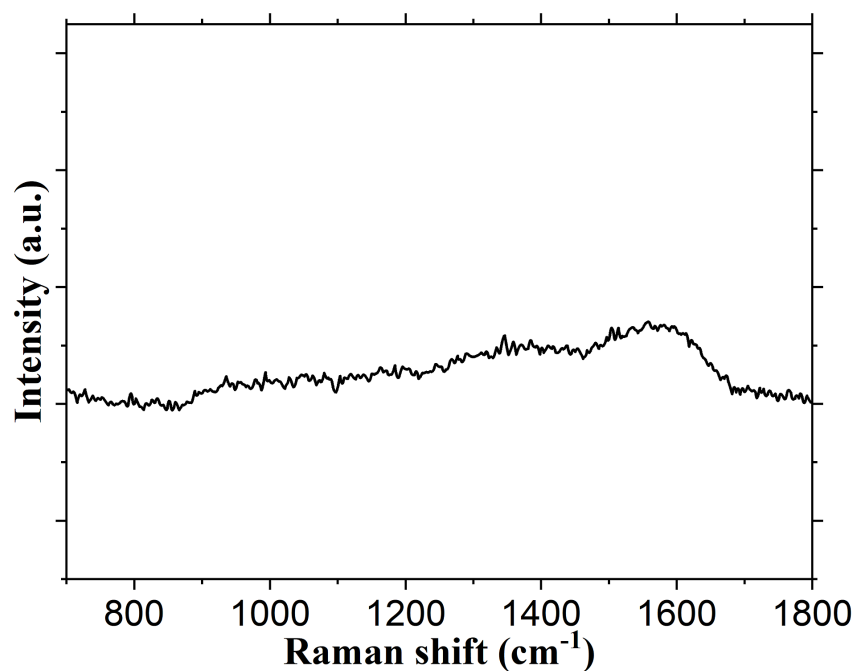

**Figure S7.** A typical surface Raman spectrum of the blank SERS-1 substrate without immersing in any solution of probe molecules for treatment.

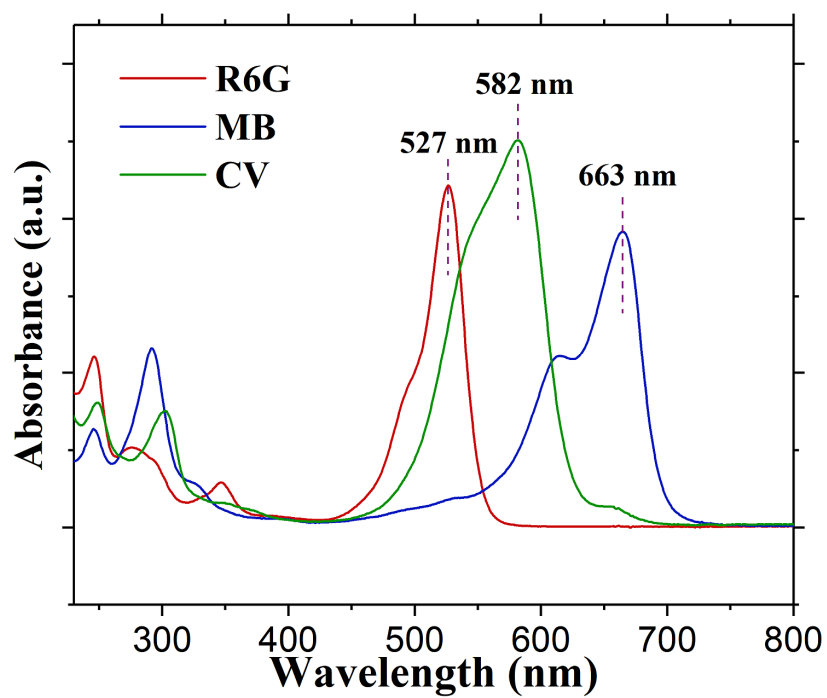

**Figure S8.** UV-vis absorption spectra of R6G, CV, and MB solutions.



**Table S1.** Recent progress of the Cu-based SERS-active substrates for detecting the trace amount of analyte

| SERS-active substrates                                                     | Analyte    | The lower limit of detection ( $C_{\text{analyte}}$ , M) | Refs.            |
|----------------------------------------------------------------------------|------------|----------------------------------------------------------|------------------|
| AgNFs/G@Cu substrate                                                       | R6G        | $10^{-14}$                                               | Ref. 1           |
| AgCu alloy nanowires                                                       | R6G        | $10^{-14}$                                               | Ref. 2           |
| Ag hollow microcubes based on $\text{Cu}_2\text{O}$ cubes template         | R6G        | $10^{-12}$                                               | Ref. 3           |
| NPC film/Cu foil                                                           | R6G        | $10^{-9}$                                                | Ref. 4           |
| Ag nanosheets on the Cu plate                                              | R6G        | $10^{-12}$                                               | Ref. 5           |
| Ag-Cu SERS substrates                                                      | R6G        | $5 \times 10^{-5}$                                       | Ref. 6           |
| Au-Ag-Cu nanodendrites                                                     | R6G        | $10^{-10}$                                               | Ref. 7           |
| Cu-Ag hybrid NWs                                                           | R6G        | $10^{-8}$                                                | Ref. 8           |
| $\text{MoS}_2$ @CuNPs                                                      | R6G        | $10^{-9}$                                                | Ref. 9           |
| Ag/Cu/PET substrate                                                        | R6G        | $10^{-10}$                                               | Ref. 10          |
| Ag-Cu@G sample                                                             | R6G        | $10^{-6}$                                                | Ref. 11          |
| Ag nano/micro-structures on Cu micro-grid                                  | R6G        | $10^{-7}$                                                | Ref. 12          |
| Graphene/bilayer Ag/Cu sandwich structures                                 | R6G        | $10^{-8}$                                                | Ref.13           |
| Cu-Au sandwich structures on PE                                            | R6G        | $10^{-5}$                                                | Ref. 14          |
| Cu-Au sandwich structures on PET                                           |            |                                                          |                  |
| <b>Cu-Ag-@ABS/<math>\text{Cu}_2(\text{OH})\text{PO}_4</math> composite</b> | <b>R6G</b> | <b><math>10^{-17}</math></b>                             | <b>This work</b> |
